# Supplementary material for: Combination of enzyme- and Lewis acid-catalyzed reactions: a new method for the synthesis of 6,7-dihydrobenzofuran-4(5H)-ones starting from 2,5-dimethylfuran and 1,3-cyclohexanediones
Source: Royal Society of Chemistry journal article supplement (doi:10.1039/c3ob40926k), 2013-01-01
Supplement: c3ob40926k.pdf [file c3ob40926k.pdf]

# Combination of Enzyme- and Lewis Acid-Catalyzed Reactions: A New Method for the Synthesis of 6,7-Dihydrobenzofuran-4(5*H*)-ones Starting from 2,5-Dimethylfuran and 1,3-Cyclohexanediones

Chimène Asta,<sup>a</sup> Dietmar Schmidt,<sup>a</sup> Jürgen Conrad,<sup>a</sup> Wolfgang Frey<sup>b</sup> and Uwe Beifuss<sup>a\*</sup>

<sup>a</sup> *Bioorganische Chemie, Institut für Chemie, Universität Hohenheim, Garbenstraße 30, D-70599 Stuttgart, Germany, Fax: (+49)711-459-22951; e-mail: [ubeifuss@uni-hohenheim.de](mailto:ubeifuss@uni-hohenheim.de)*

<sup>b</sup> *Institut für Organische Chemie, Universität Stuttgart, Pfaffenwaldring 55, D-70569, Stuttgart, Germany*

## Supporting Information

|                                                                                |        |
|--------------------------------------------------------------------------------|--------|
| <b>Table of contents</b>                                                       | S1     |
| NMR Spectra                                                                    | S2     |
| FIGURES 1-8. NMR spectra of compounds <b>5a-h</b>                              | S3-S11 |
| FIGURE 9. Structure of <b>5d</b> derived from X-ray crystal structure analysis | S11    |

## NMR spectra

All NMR data were processed with *Spinworks 3.1.8.*, copyright © 2011, Kirk Marat,  
*University of Manitoba*

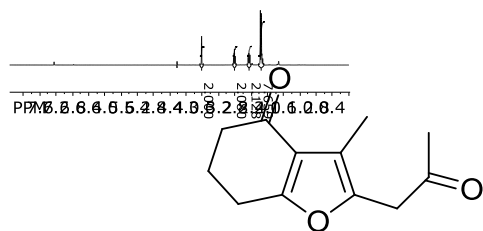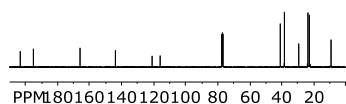

**FIGURE 1.**  $^1\text{H}$  (300 MHz) and  $^{13}\text{C}$  (75MHz) NMR spectra of **5a** in  $\text{CDCl}_3$ .

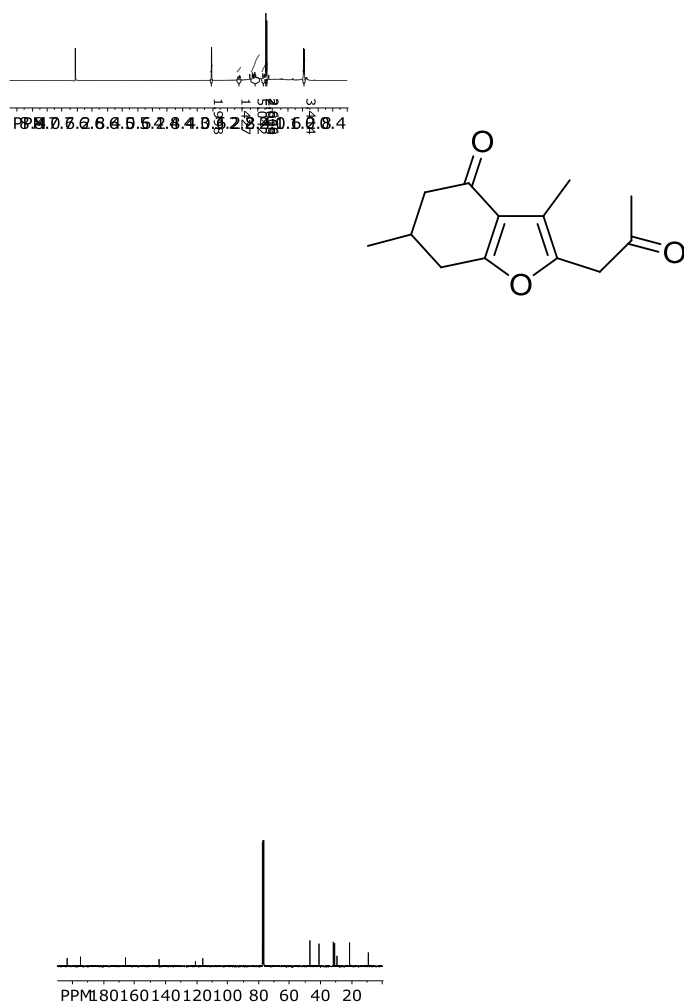

**FIGURE 2.** <sup>1</sup>H (300 MHz) and <sup>13</sup>C (75MHz) NMR spectra of **5b** in CDCl<sub>3</sub>.

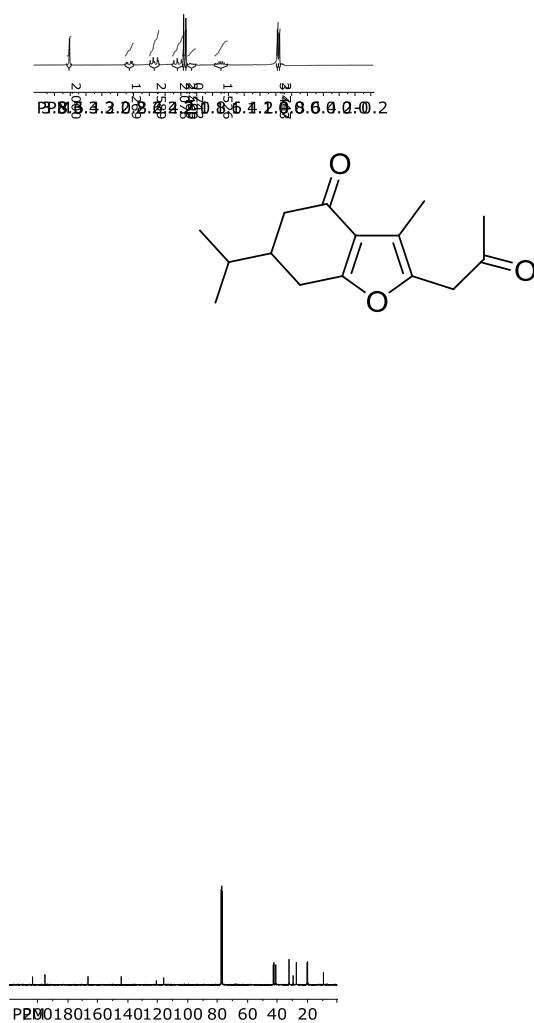

**FIGURE 3.**  $^1\text{H}$  (300 MHz) and  $^{13}\text{C}$  (75MHz) NMR spectra of **5c** in  $\text{CDCl}_3$

**FIGURE 3.**  $^1\text{H}$  (300 MHz) and  $^{13}\text{C}$  (75MHz) NMR spectra of **5c** in  $\text{CDCl}_3$ .

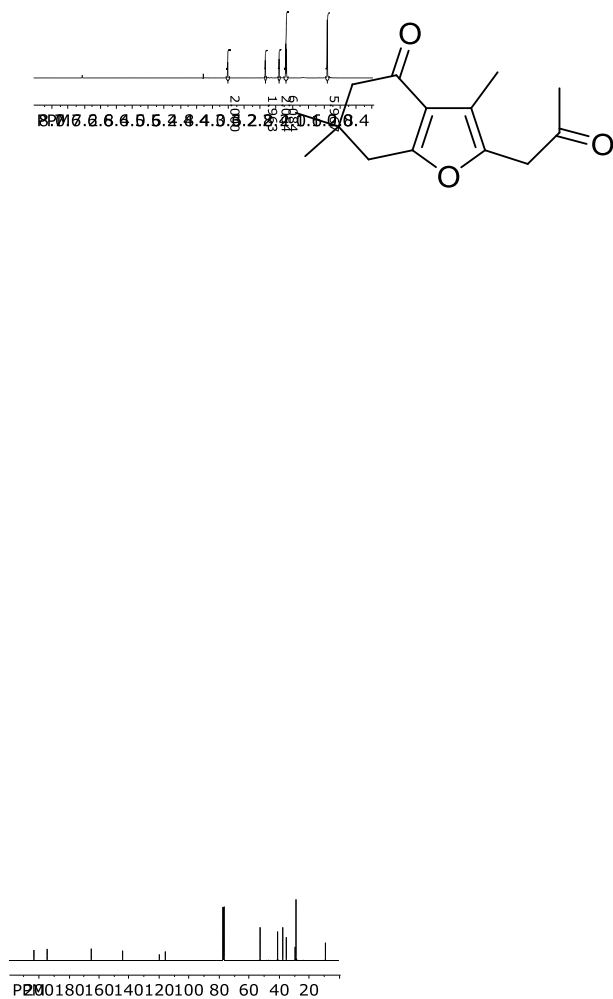

**FIGURE 4.**  $^1\text{H}$  (300 MHz) and  $^{13}\text{C}$  (75MHz) NMR spectra of **5d** in  $\text{CDCl}_3$ .

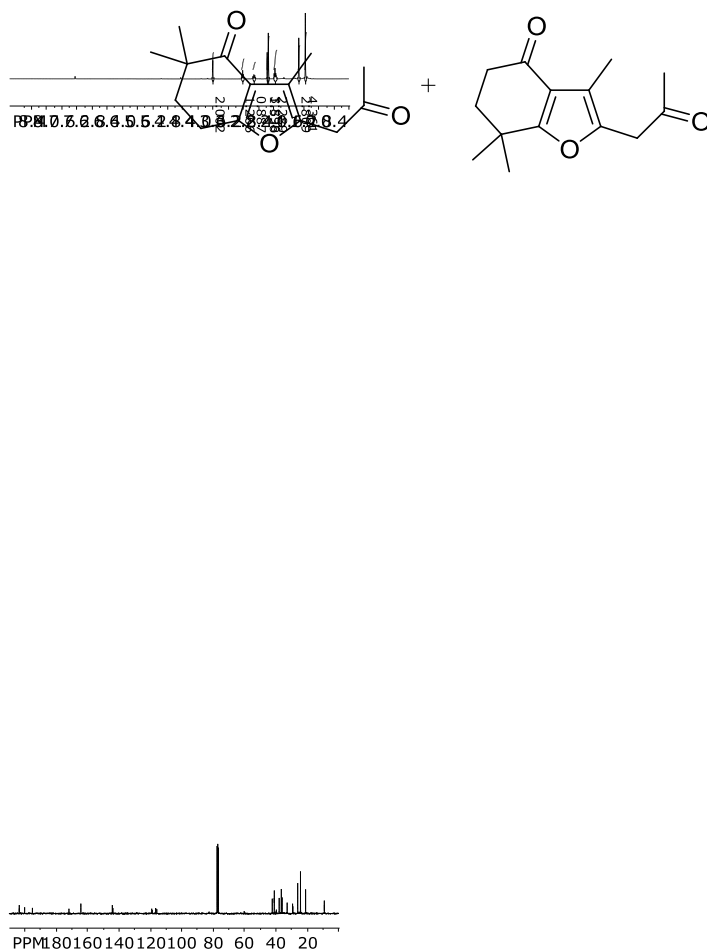

**FIGURE 5.** <sup>1</sup>H (300 MHz) and <sup>13</sup>C (75MHz) NMR spectra of **5e** in CDCl<sub>3</sub>.

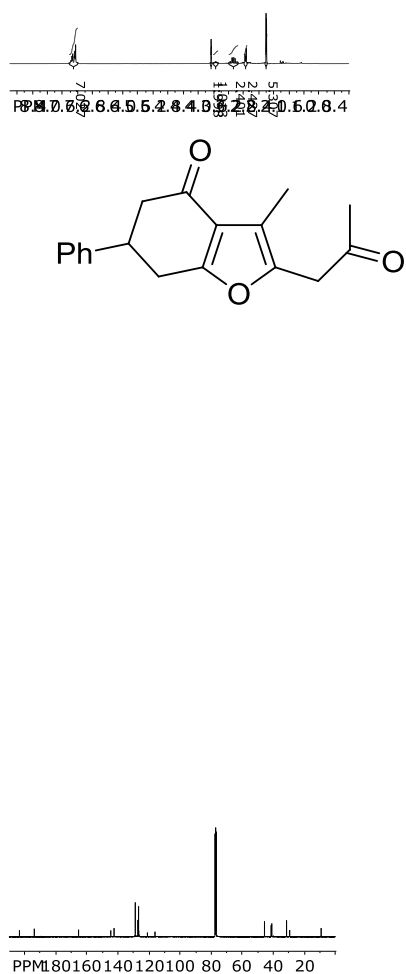

**FIGURE 6.**  $^1\text{H}$  (300 MHz) and  $^{13}\text{C}$  (75MHz) NMR spectra of **5f** in  $\text{CDCl}_3$ .

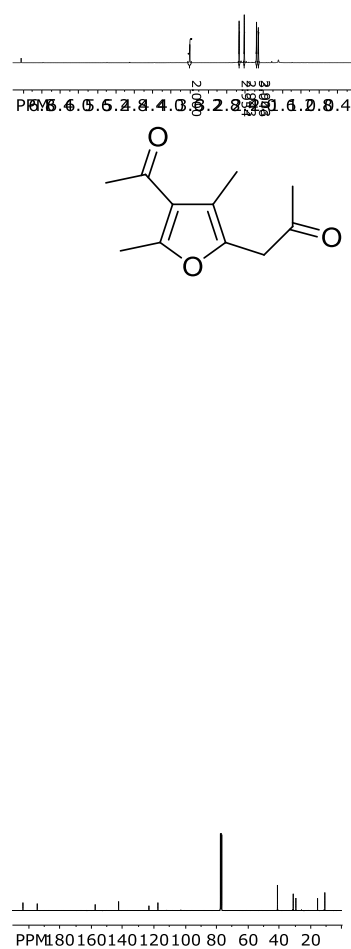

**FIGURE 7.**  $^1\text{H}$  (300 MHz) and  $^{13}\text{C}$  (75MHz) NMR spectra of **5g** in  $\text{CDCl}_3$ .

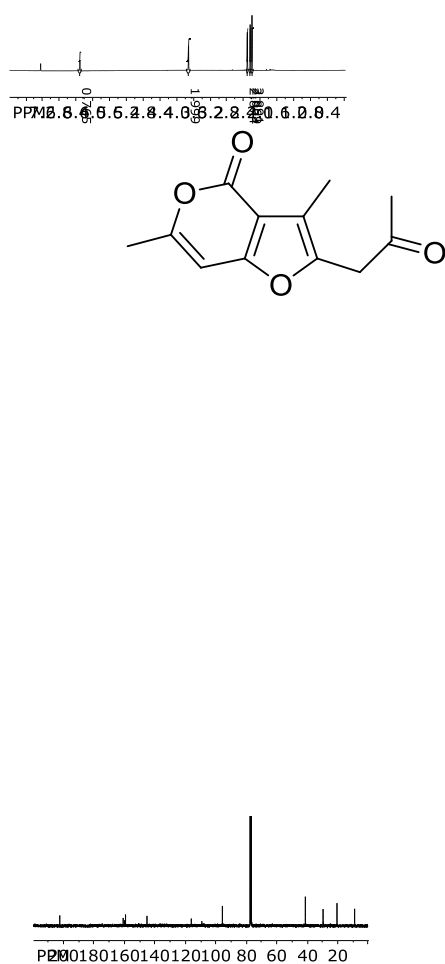

**FIGURE 8.**  $^1\text{H}$  (300 MHz) and  $^{13}\text{C}$  (75MHz) NMR spectra of **5h** in  $\text{CDCl}_3$ .

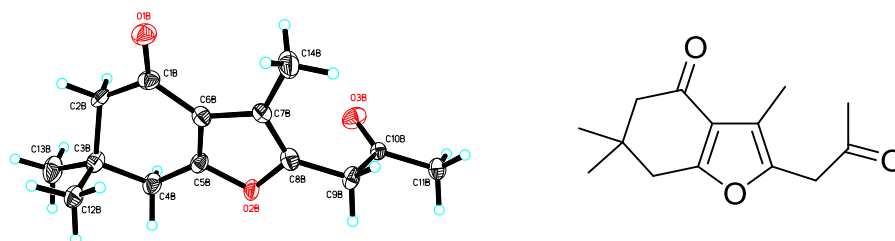

**FIGURE 9.** Structure of **5d** derived from X-ray crystal structure analysis.
